# Supplementary material
Source: publisher figshare collection journal article supplement (https://acs.figshare.com/ndownloader/files/4206385)
Supplement: Supplementary file 1 [file 4206385]

**Strong Piezoelectricity in  $(1-x)(\text{K}_{0.4}\text{Na}_{0.6})(\text{Nb}_{0.96}\text{Sb}_{0.04})\text{O}_3$ - $x\text{Bi}_{0.5}\text{K}_{0.5}\text{Zr}_{1-y}\text{Sn}_y\text{O}_3$**   
**Lead-free Binary System: Identification and Role of Multiphase Coexistence**

Ting Zheng, Jiagang Wu<sup>a)</sup>, Dingquan Xiao, and Jianguo Zhu

*Department of Materials Science, Sichuan University, Chengdu 610064, P.R.China*

Xiangjian Wang, Lipeng Xin, and Xiaojie Lou

*Multi-disciplinary Materials Research Center, Frontier Institute of Science and  
Technology, and State Key Laboratory for Mechanical Behavior of Materials, Xi'an  
Jiaotong University, Xi'an 710049, P. R. China*

---

a) Corresponding author: Email: [msewujiang@scu.edu.cn](mailto:msewujiang@scu.edu.cn) and [wujiagang0208@163.com](mailto:wujiagang0208@163.com)

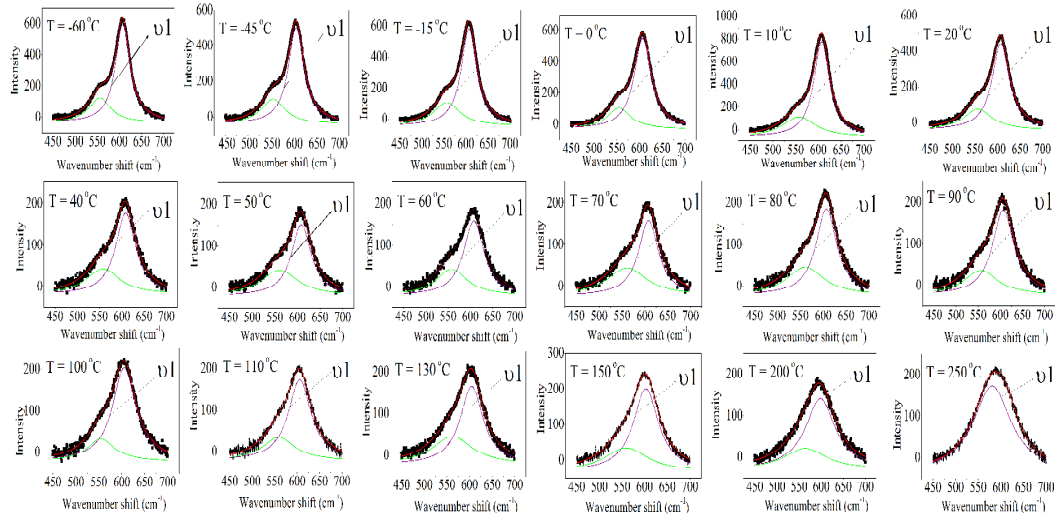

**Figure S1:** Magnified and fitted Raman spectra in the wavenumber ranges from 450 to 700  $\text{cm}^{-1}$  of the ceramics with  $x=0.04$ ,  $y=0.1$ .

Figure S1 shows the magnified and fitted Raman spectra in the wavenumber ranges from 450 to 700  $\text{cm}^{-1}$  of the ceramics with  $x=0.04$ ,  $y=0.1$ . One can see that the temperatures strongly affect the  $\nu_1$  mode which associated with  $\text{BO}_6$  perovskite octahedron [1,2], indicating that the phase transitions of this work can result from the temperatures.

## References

- (1) Kakimoto, K.; Akao, K.; Guo, Y.; Ohsato, H. Raman Scattering Study of Piezoelectric  $(\text{Na}_{0.5}\text{K}_{0.5})\text{NbO}_3\text{-LiNbO}_3$  Ceramics Jpn. J. Appl. Phys. 2005, 44, 7064.
- (2) Klein, N.; Hollenstein, E.; Damjanovic, D.; Trodahl, H. J.; Setter, N.; Kuball, M. A Study Of The Phase Diagram of  $(\text{K,Na,Li})\text{NbO}_3$  Determined By Dielectric And Piezoelectric Measurements, and Raman Spectroscopy J. Appl. Phys. 2007, 102, 014112.
